# Supplementary material for: Investigating the structure–fluorescence properties of tetraphenylethylene fused imidazole AIEgens: reversible mechanofluorochromism and polymer matrix controlled fluorescence tuning
Source: Royal Society of Chemistry journal article supplement (doi:10.1039/d1ce00561h), 2021-01-01
Supplement: d1ce00561h1.pdf [file d1ce00561h1.pdf]

## Electronic Supplementary Information (ESI)

### **Investigating Structure-Fluorescence Properties of Imidazole Fused Tetraphenylethylene AIEgens: Reversible Mechanofluorochromism and Polymer Matrix Controlled Fluorescence Tuning**

Palaniyappan Nagarasu,<sup>a</sup> Anu Kundu,<sup>b</sup> Vijay Thiruvengadam,<sup>c</sup> Pallepogu Raghavaiah,<sup>d</sup> Savarimuthu Philip Anthony<sup>b\*</sup> and Vedichi Madhu<sup>a\*</sup>

<sup>a</sup>*Department of Chemistry, Karunya Institute of Technology and Science, Coimbatore-641 114, Tamil Nadu, India. Tel: +91-422-261-4483;  
E-mail: [madhu@karunya.edu](mailto:madhu@karunya.edu); [vmadhu1@gmail.com](mailto:vmadhu1@gmail.com)*

<sup>b</sup>*School of Chemical & Biotechnology, SASTRA Deemed University, Thanjavur- 613401, Tamil Nadu, India. [philip@biotech.sastra.edu](mailto:philip@biotech.sastra.edu)*

<sup>c</sup>*Discipline of Biological Engineering, Indian Institute of Technology Gandhinagar, Gandhinagar, Gujarat, 382355, India*

<sup>d</sup>*School of Chemical Sciences, Department of Chemistry, Central University of Karnataka, Kalaburagi-585367, India.*

| <b>S.No.</b> | <b>Content</b>                               | <b>Page No.</b> |
|--------------|----------------------------------------------|-----------------|
| 1.           | Materials and Methods                        | 3               |
| 2.           | FT-IR Analysis                               | 4               |
| 3.           | NMR Studies                                  | 8               |
| 4.           | Mass Analysis                                | 15              |
| 5.           | Photophysical Properties                     | 18              |
| 6.           | Thermogravimetric Analysis                   | 19              |
| 7.           | Single Crystal X-ray Crystallography Studies | 23              |
| 8.           | Mechanofluorochromism Studies                | 26              |
| 9.           | Powder X-ray Diffraction (PXRD) Studies      | 29              |
| 10.          | Acid-Responsive Fluorescence Studies         | 29              |
| 11.          | References                                   | 30              |

## 1. Materials and Methods

All solvents and chemicals were purchased from commercial suppliers (Aldrich, Alfa Aesar, Merck and HiMedia) and was used as received. Solvents were purified using appropriate drying agents when necessary. Air and moisture sensitive reactions were carried out under N<sub>2</sub> atmosphere. Fourier transformed infrared (FT-IR) measurements were carried out with Shimadzu IR Affinity-1S spectrophotometer with KBr pellets. <sup>1</sup>H and <sup>13</sup>C NMR spectra were recorded on Bruker Avance III 400 MHz spectrometer equipped with a 5 mm BBFO probe. The UV–Vis absorption spectra were recorded with UV-Vis spectrophotometer (Jasco V-770) with BaSO<sub>4</sub> as reference, equipped with a diffuse reflectance accessory. Fluorescence spectra and absolute quantum yield for all compounds in the solid state were recorded using Jasco fluorescence spectrometer-FP-8300 instruments equipped with integrating sphere and calibrated light source. Mass spectra were recorded on Micromass ESI-Q-TOF mass spectrometer. Single crystal X-ray diffraction data were collected on a Bruker AXS SMART APEX CCD diffractometer using graphite monochromated MoK $\alpha$  ( $\lambda = 0.7107 \text{ \AA}$ ) radiation at 290(2) K and the intensities were measured using  $\omega$  scan with a scan width of 0.3°. A total of 606 frames per set were collected in different settings of  $\phi$  keeping the sample to detector distance of 6.054 cm. Crystal data were reduced by SAINTPLUS, and an empirical absorption correction was applied using the package SADABS available in the Bruker software package. All the crystal structures were solved by direct methods using SHELXS-97<sup>1</sup> and refined by full-matrix least squares method using SHELXL-97<sup>2</sup> present in the program suite WinGX (Version 1.7.0).

## 2. FT-IR Analysis

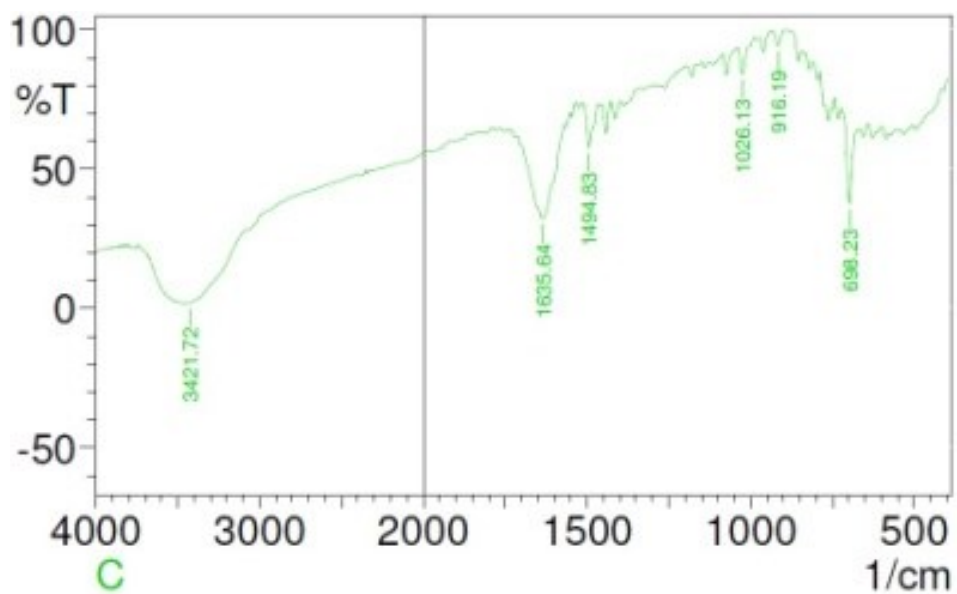

Fig. S1 FT-IR spectrum of 1.

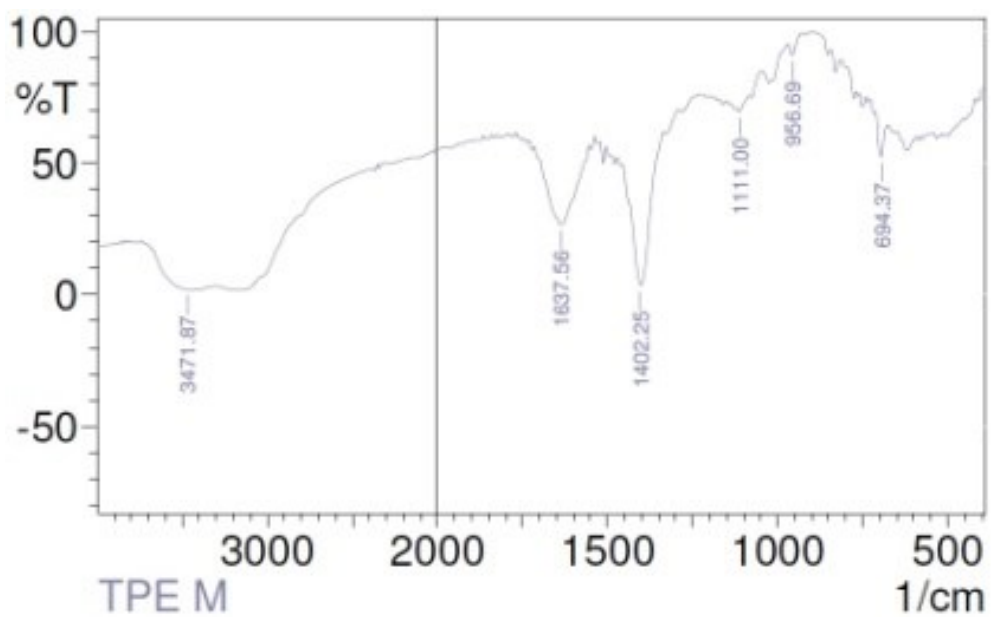

Fig. S2 FT-IR spectrum of 2.

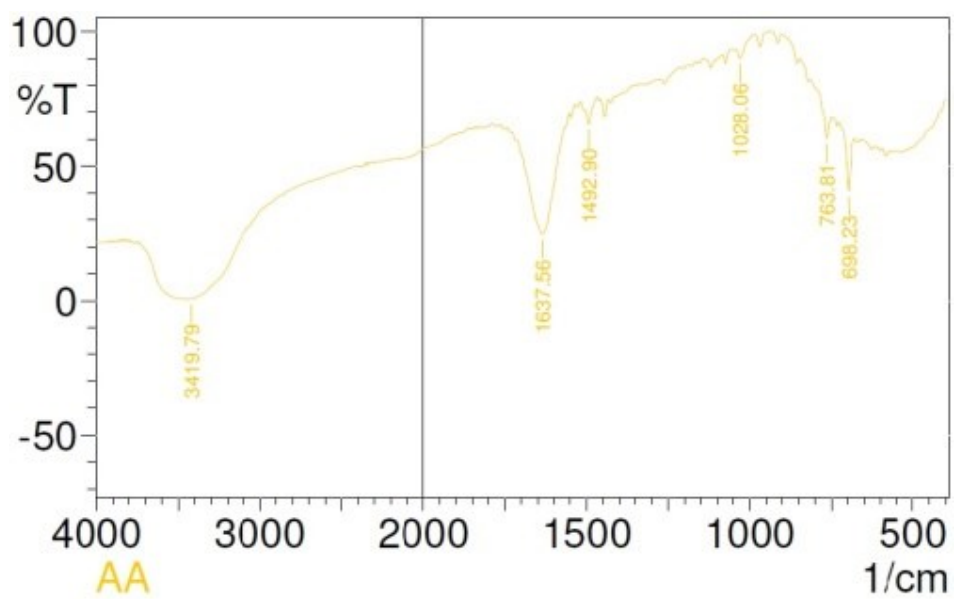

**Fig. S3** FT-IR spectrum of 3.

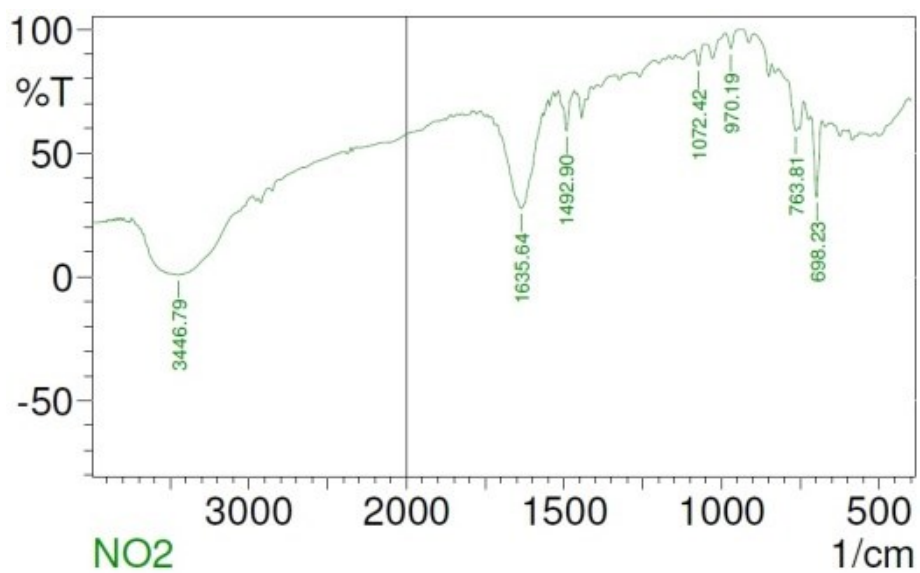

**Fig. S4** FT-IR spectrum of 4.

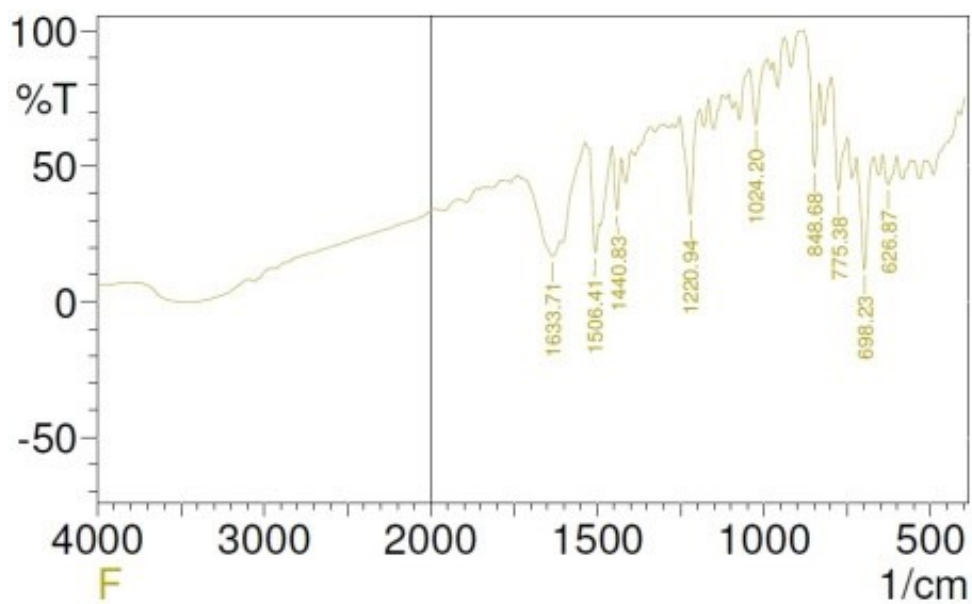

**Fig. S5** FT-IR spectrum of **5**.

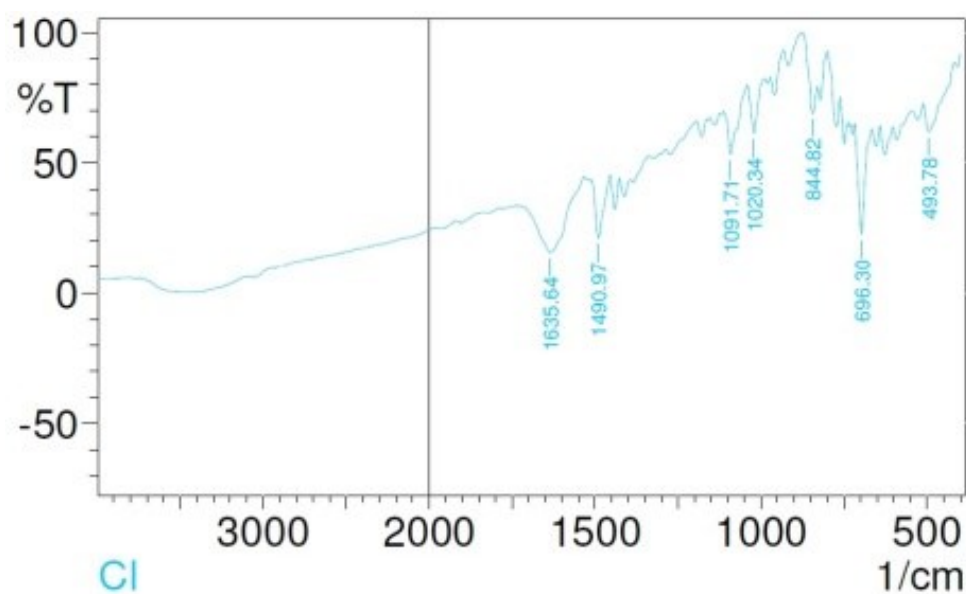

**Fig. S6** FT-IR spectrum of **6**.

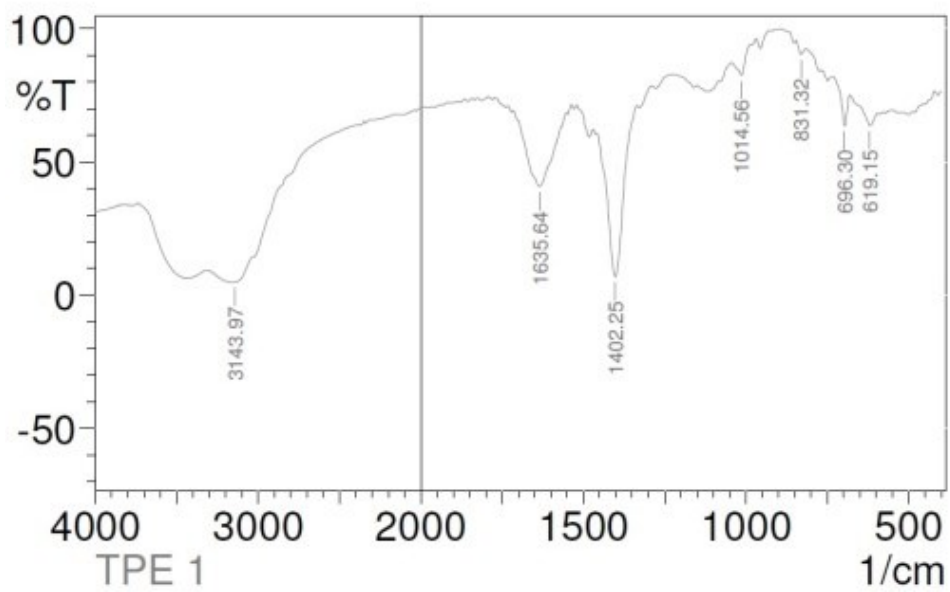

**Fig. S7** FT-IR spectrum of 7.

### 3. NMR Studies

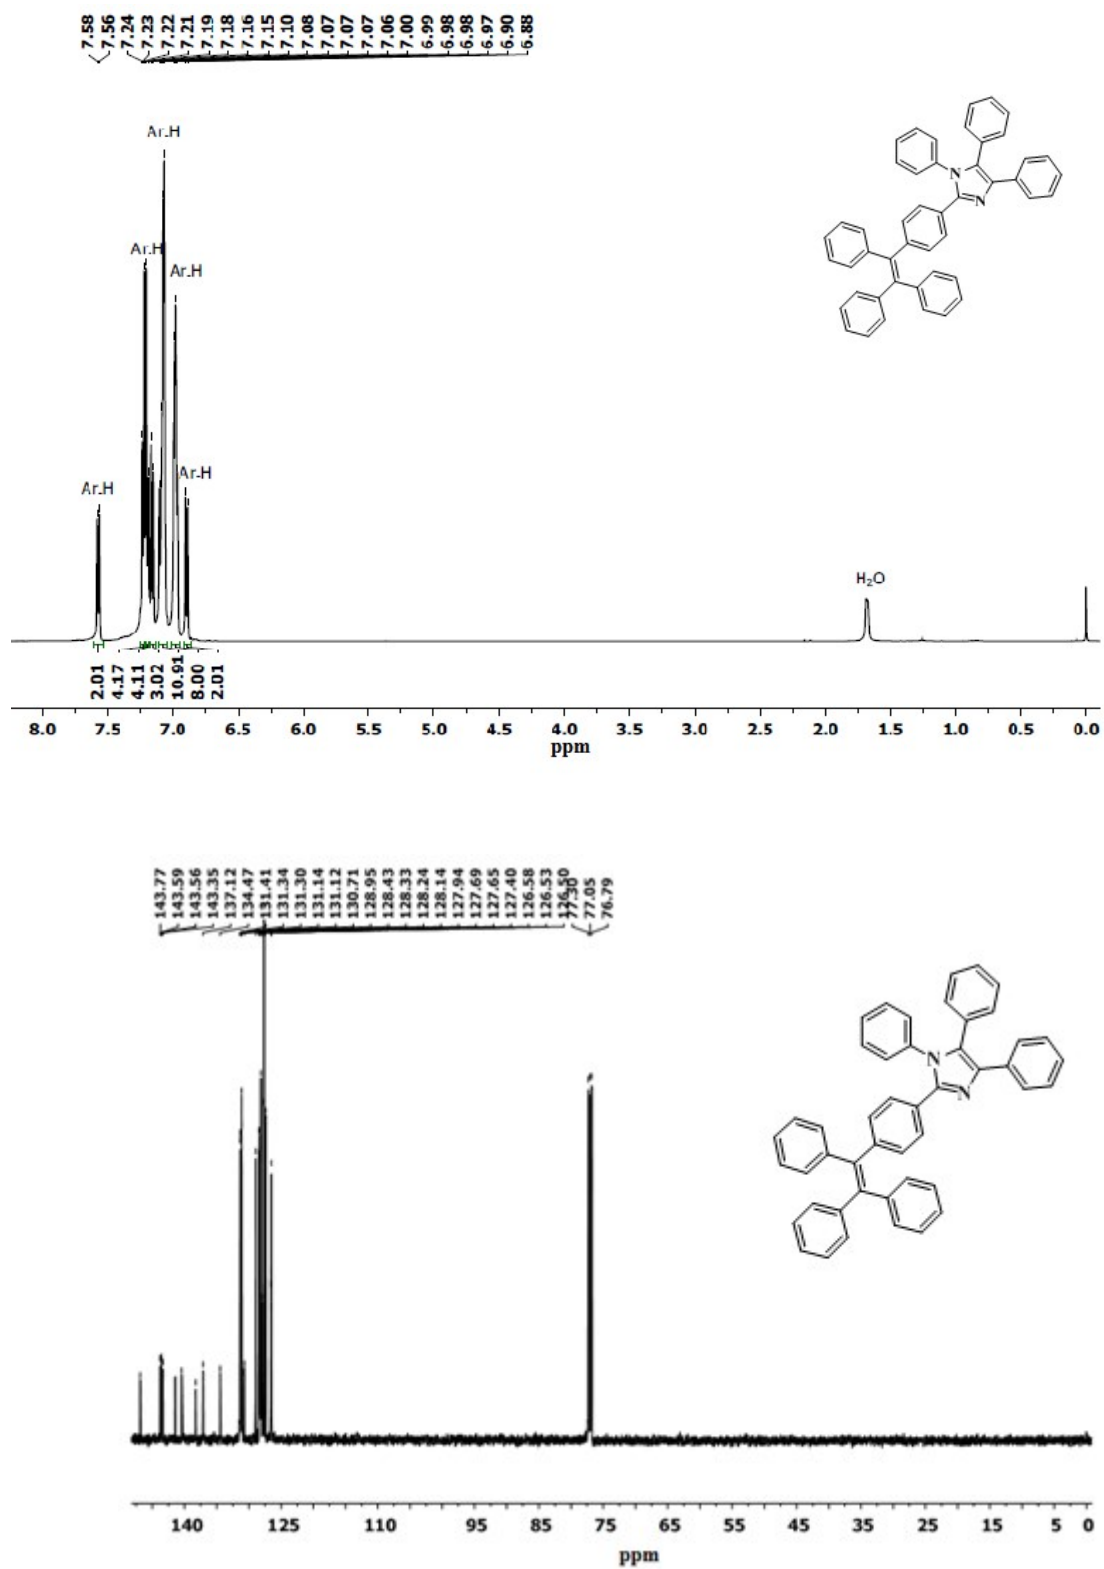

Fig. S8  $^1\text{H}$  and  $^{13}\text{C}$  NMR spectrum of **1**.



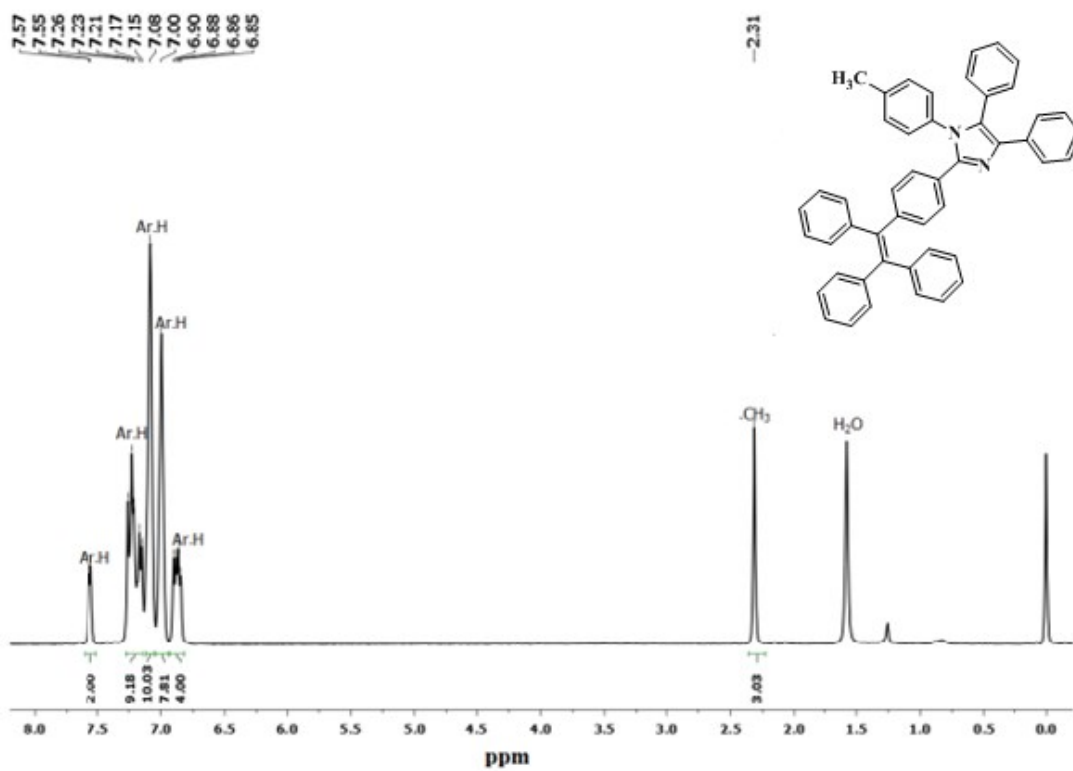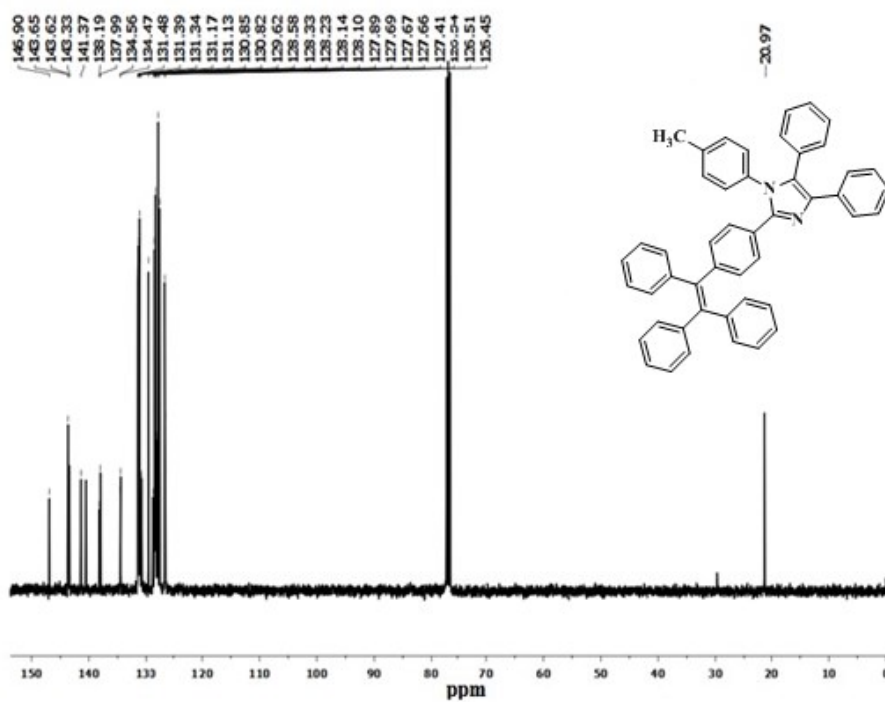

Fig. S9 <sup>1</sup>H and <sup>13</sup>C NMR spectrum of 2.

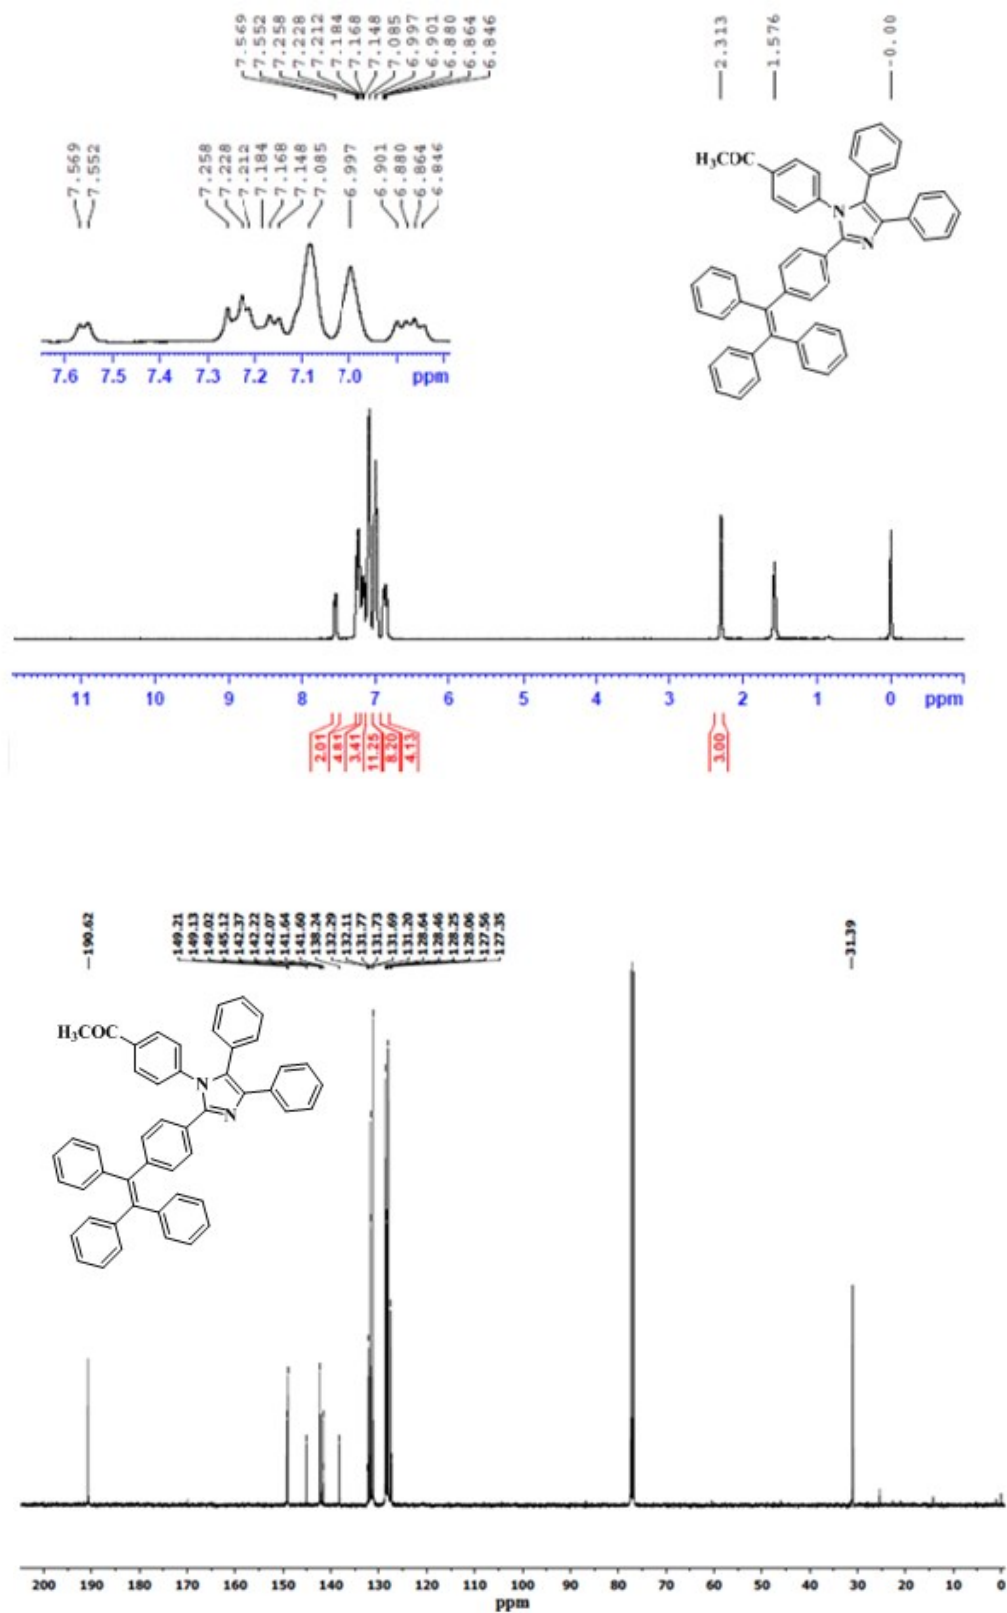

Fig. S10 <sup>1</sup>H and <sup>13</sup>C NMR spectrum of **3**.

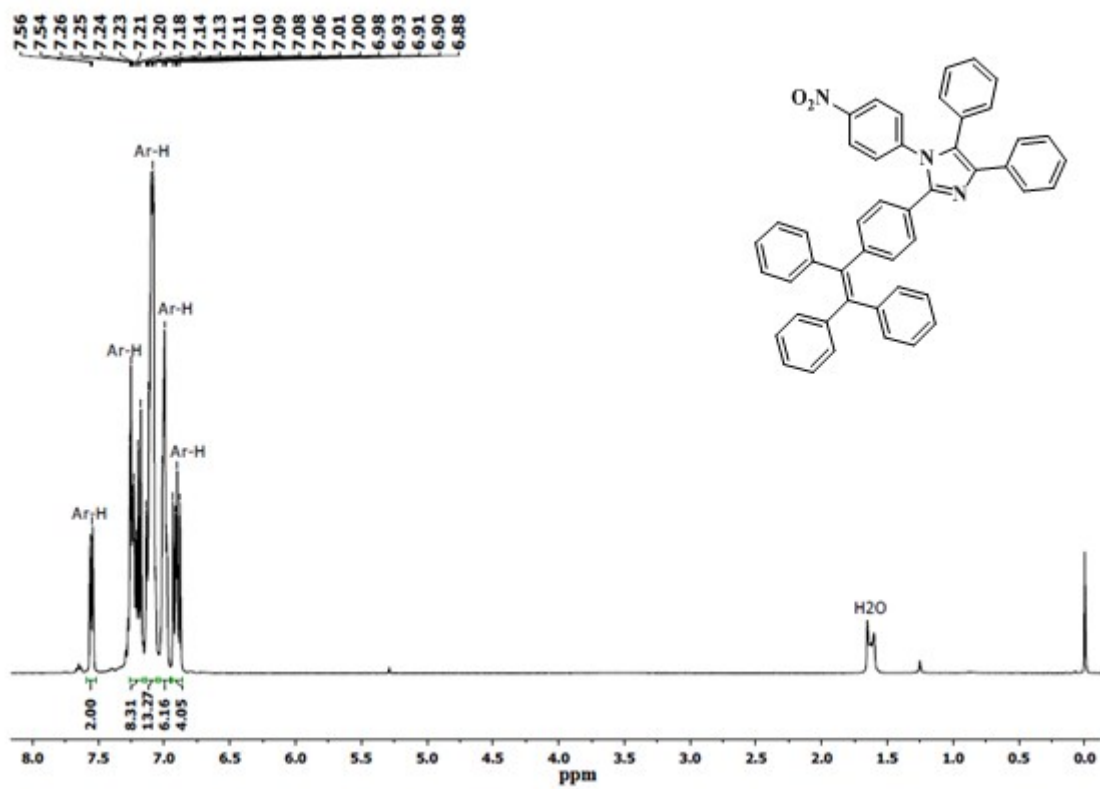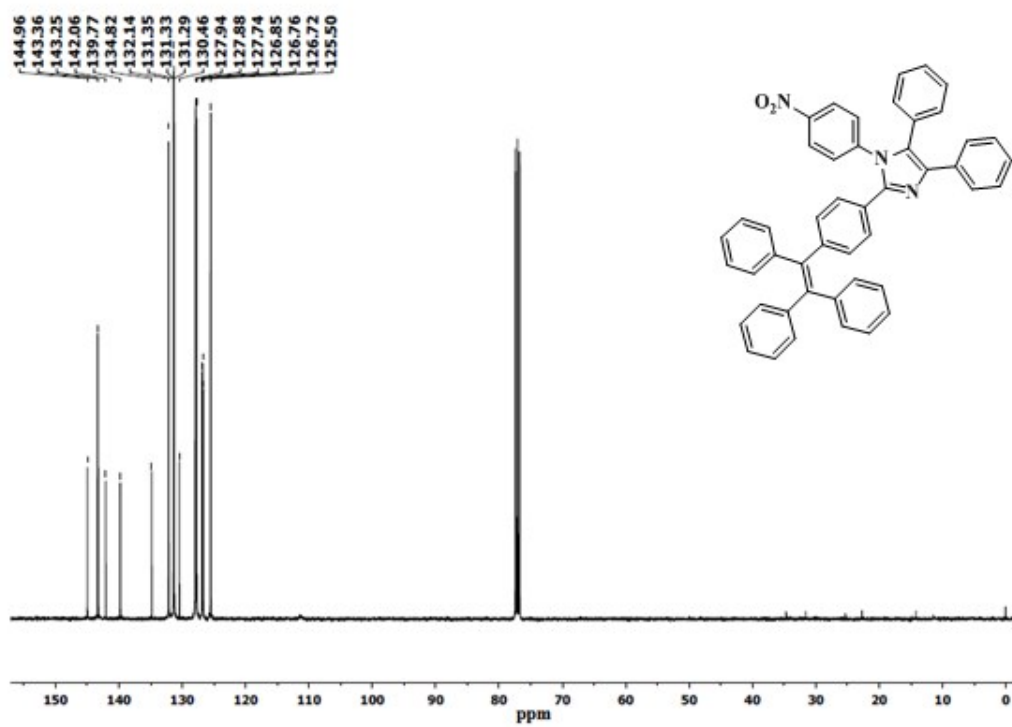

Fig. S11 <sup>1</sup>H and <sup>13</sup>C NMR spectrum of 4.

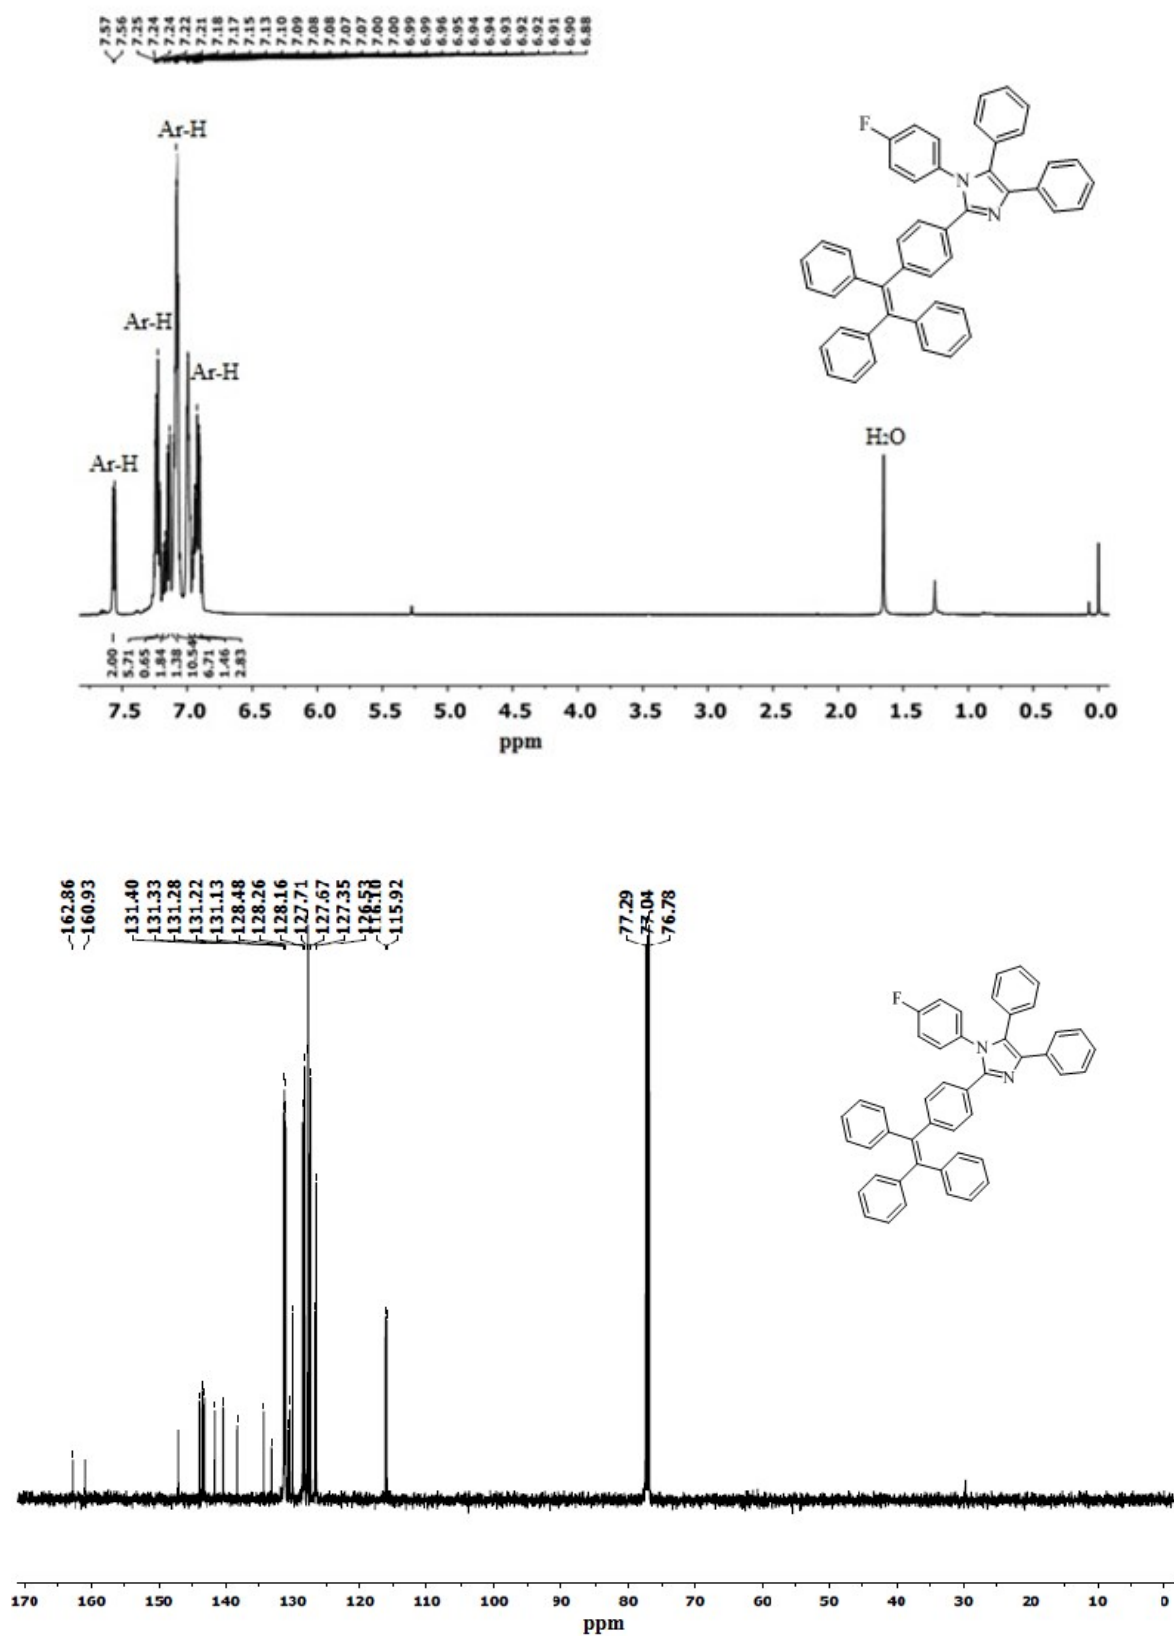

Fig. S12 <sup>1</sup>H and <sup>13</sup>C NMR spectrum of 5.

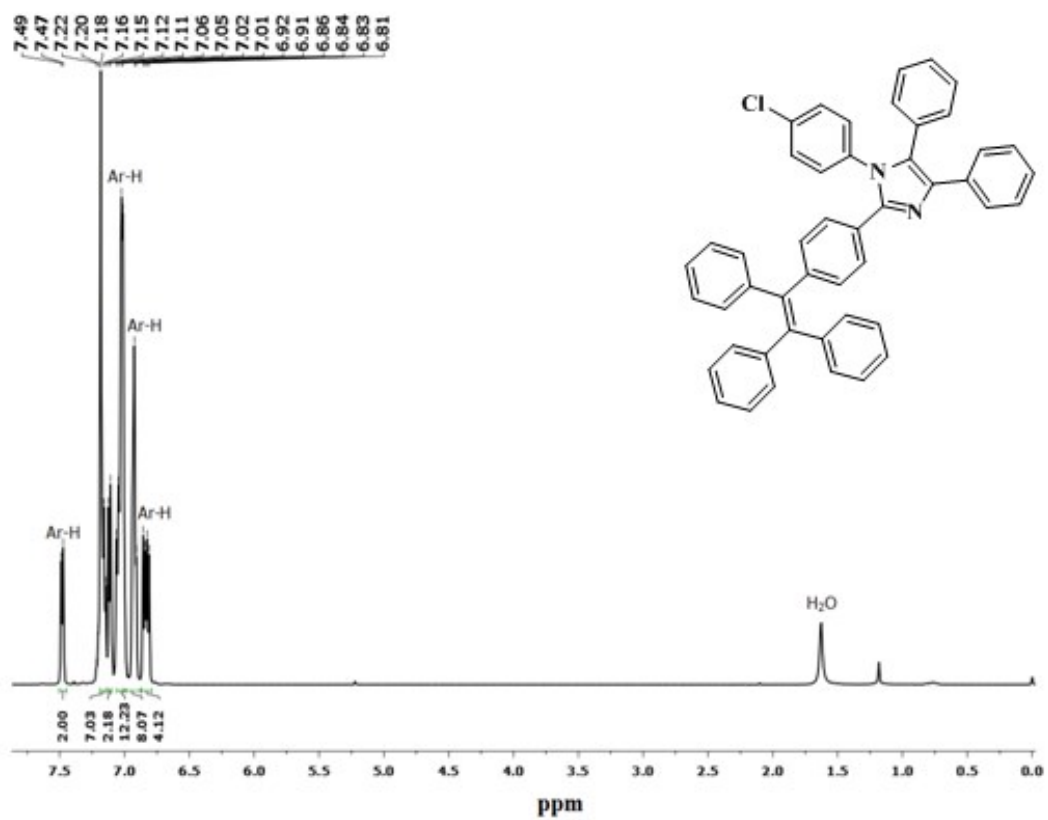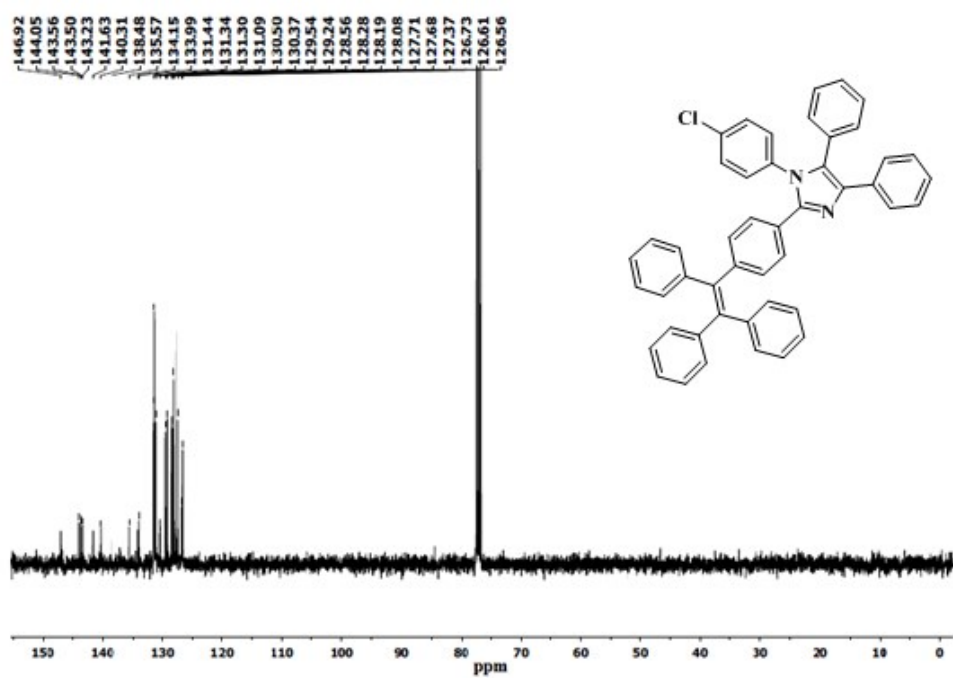

Fig. S13 <sup>1</sup>H and <sup>13</sup>C NMR spectrum of 6.

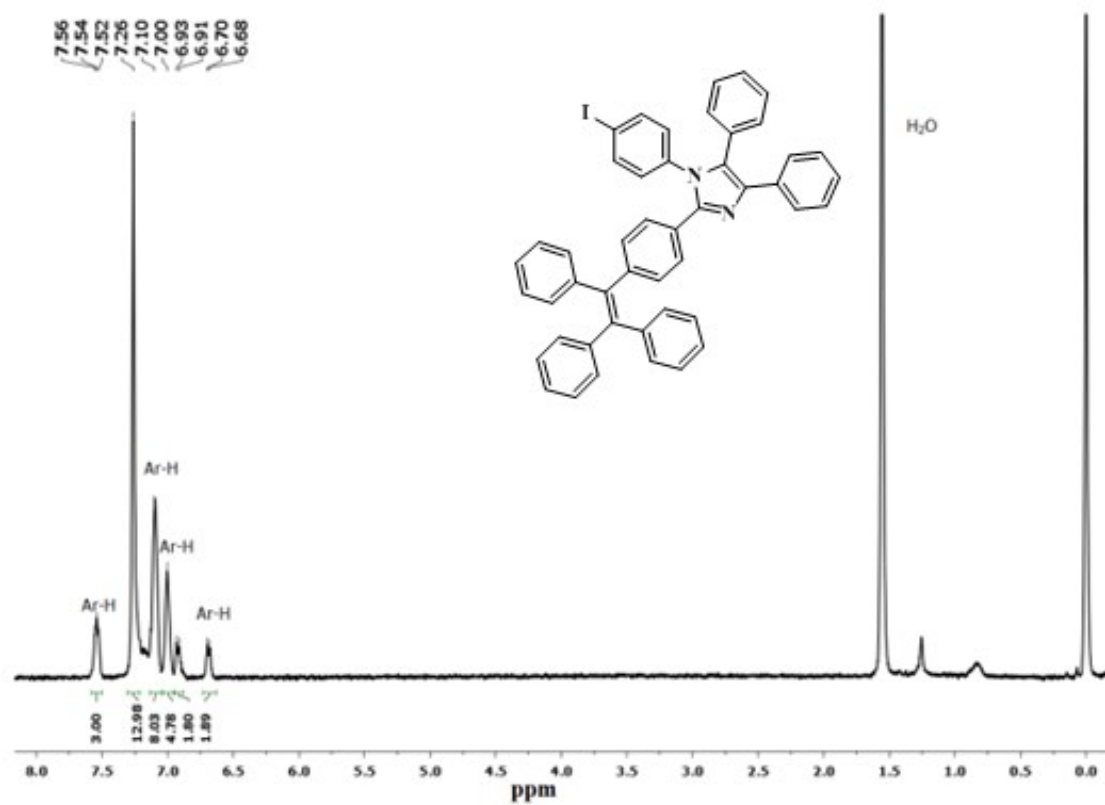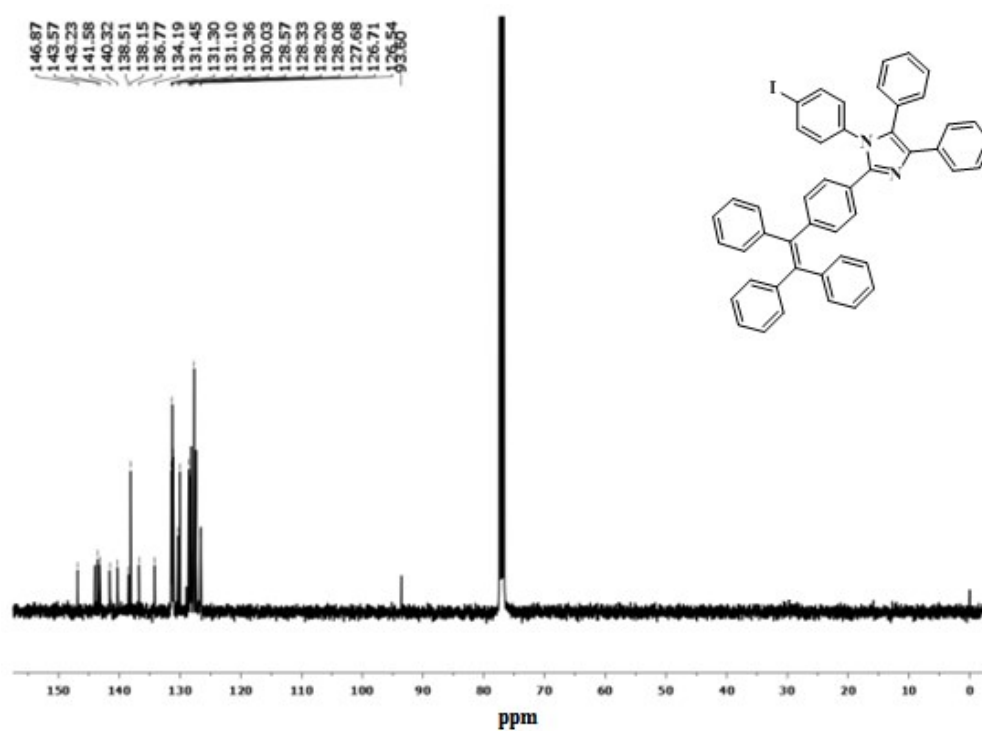

Fig. S14 <sup>1</sup>H and <sup>13</sup>C NMR spectrum of 7.

## 4. Mass Analysis

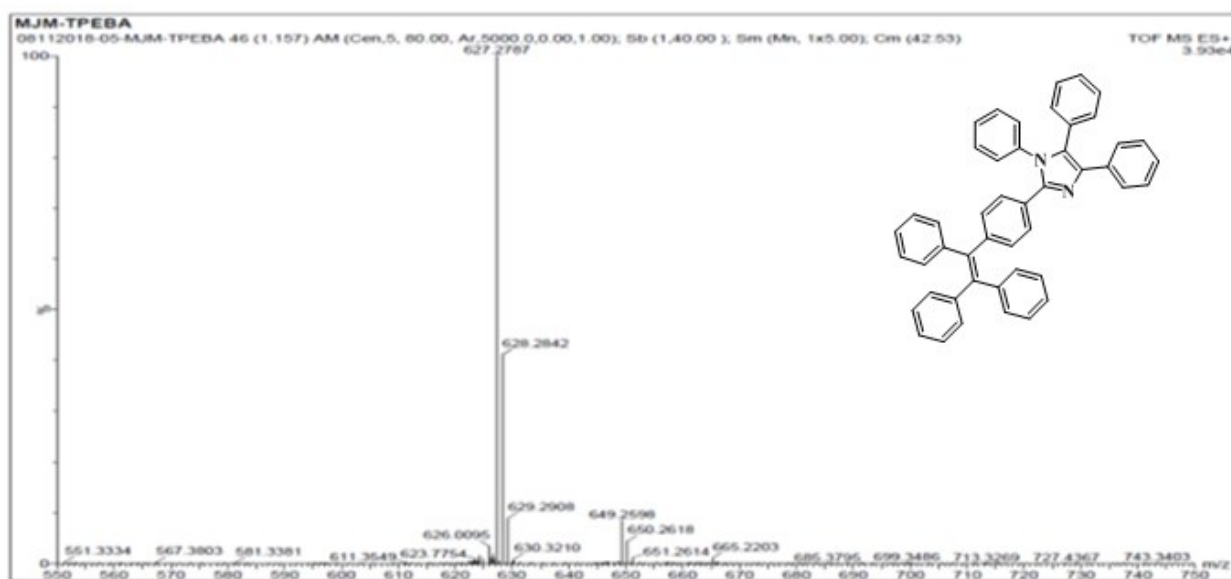

Fig. S15 Mass spectrum for 1

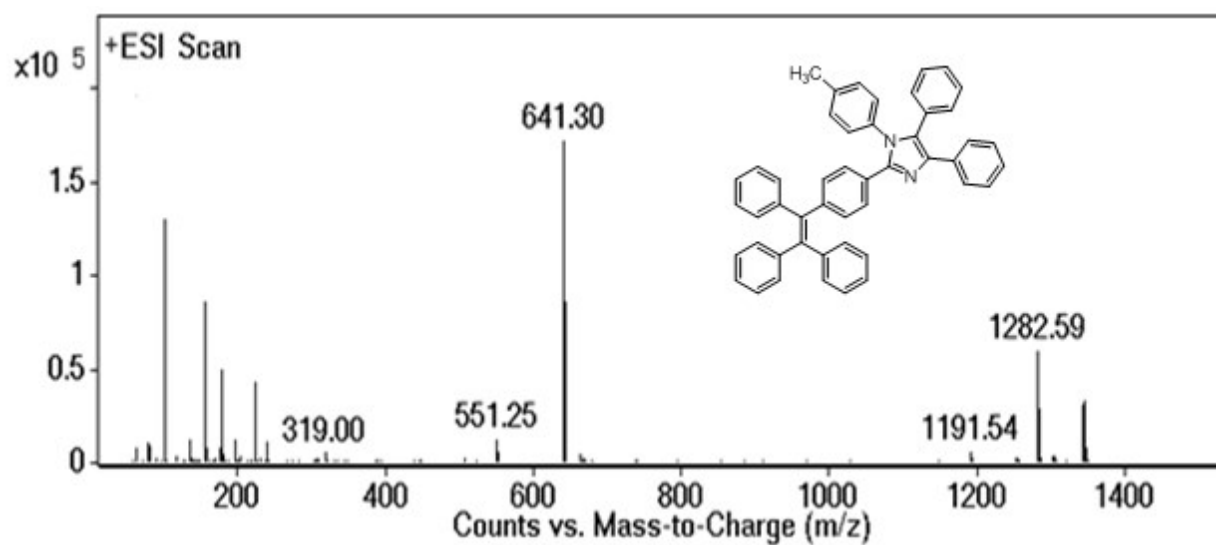

Fig. S16 Mass spectrum for 2

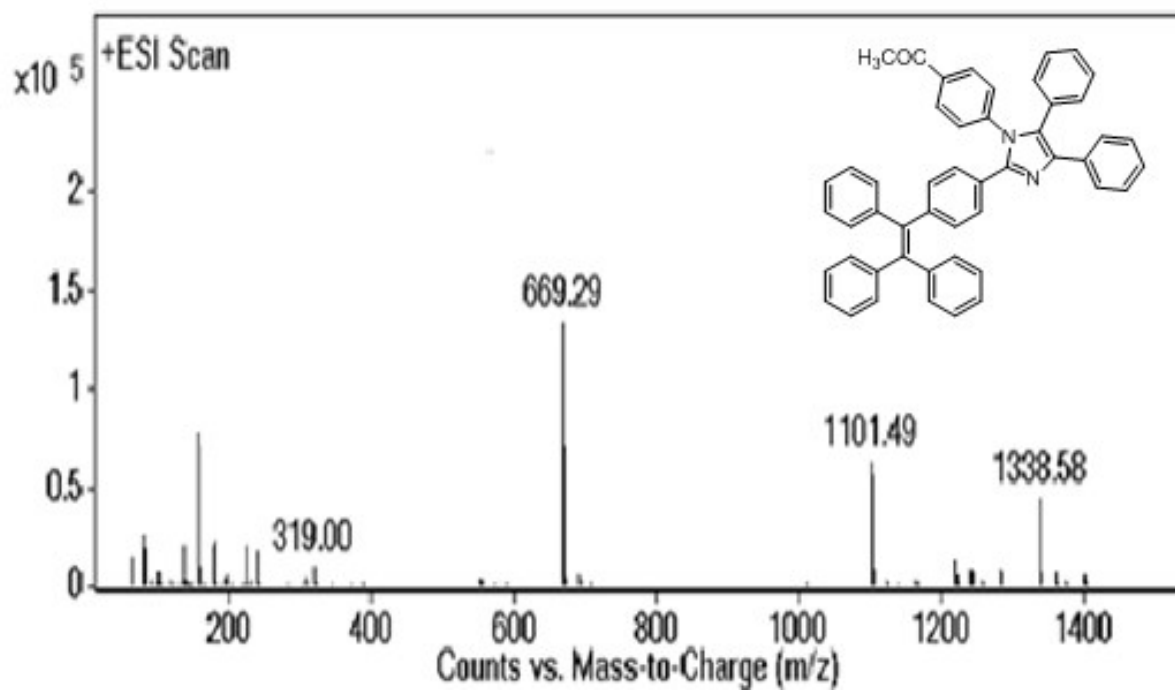

Fig. S17 Mass spectrum for 3

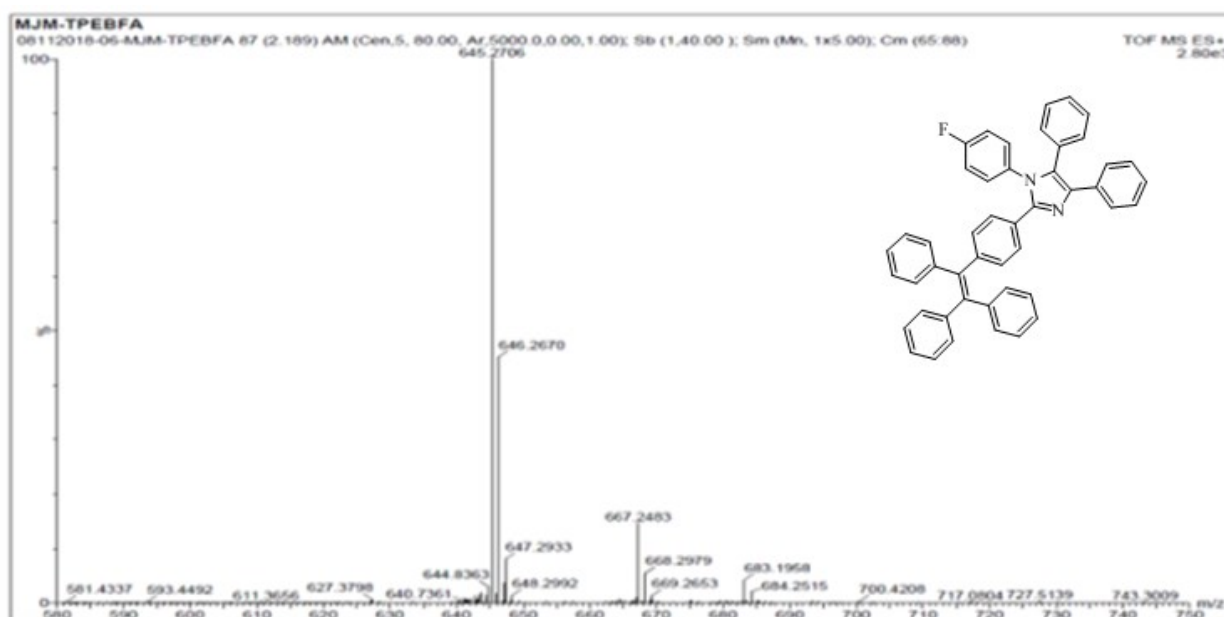

Fig. S18 Mass spectrum for 5



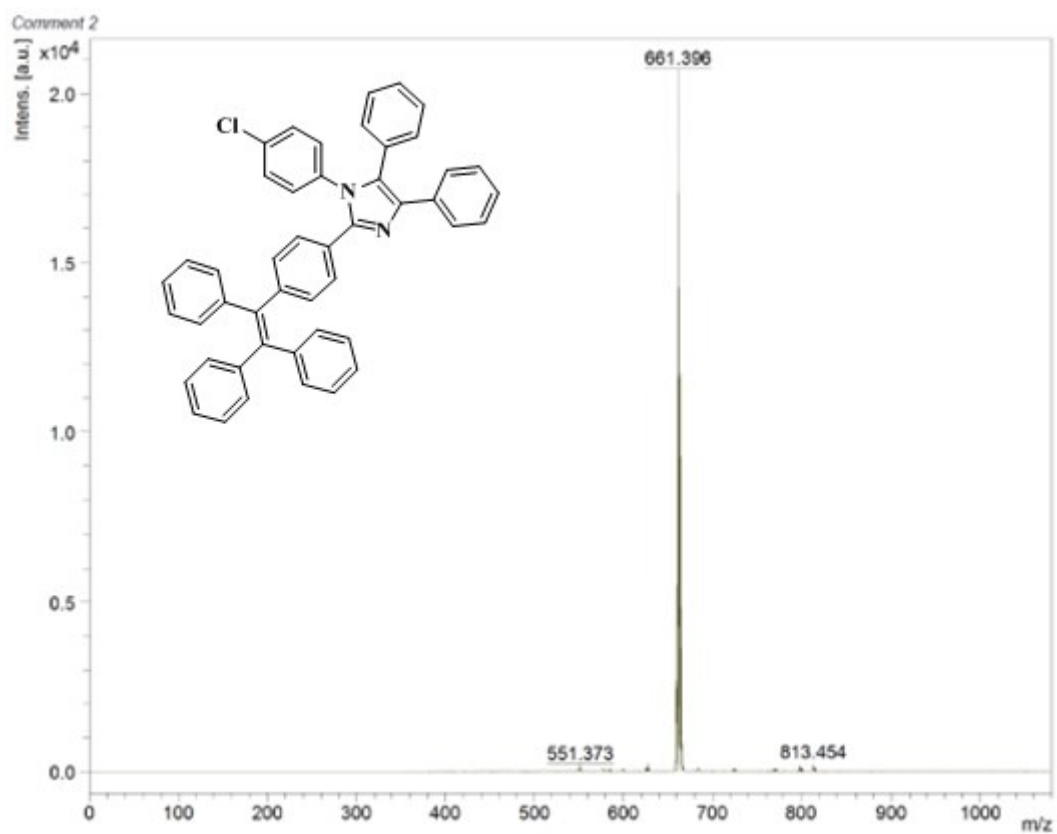

Fig. S19 Mass spectrum for 6

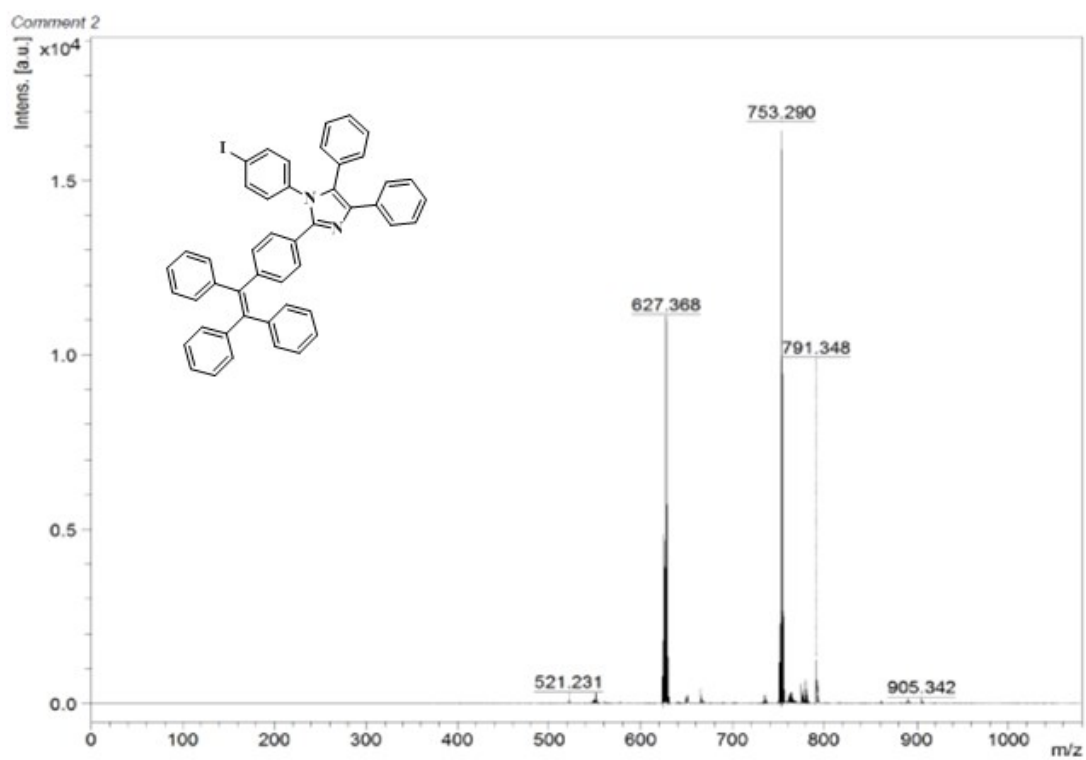

Fig. S20 Mass spectrum for 7

## 5. Photophysical Properties

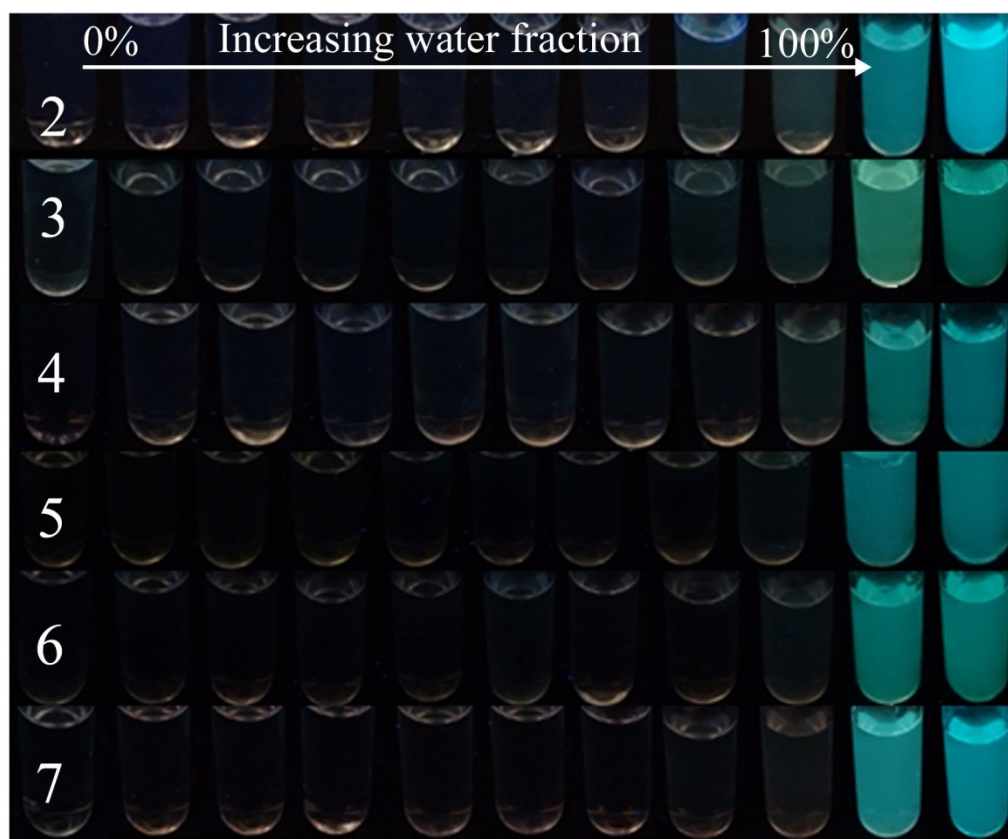

**Fig. S21** Fluorescent images of **2-7** in DMF:water mixtures with different fractions of water (top) under UV light (365 nm).

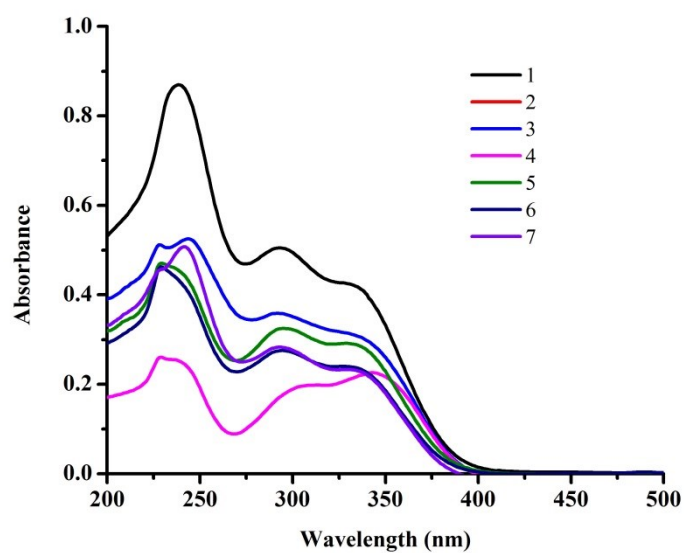

**Fig. S22** Solid state UV-Vis spectrum of **1-7**

## 6. Thermogravimetric Analysis (TGA)

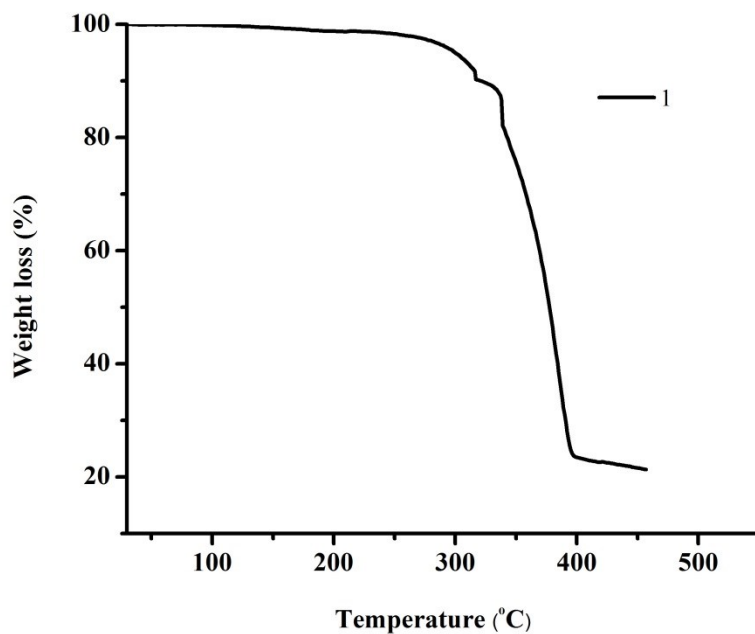

Fig. S23 Thermogravimetric analysis (TGA) curve of 1

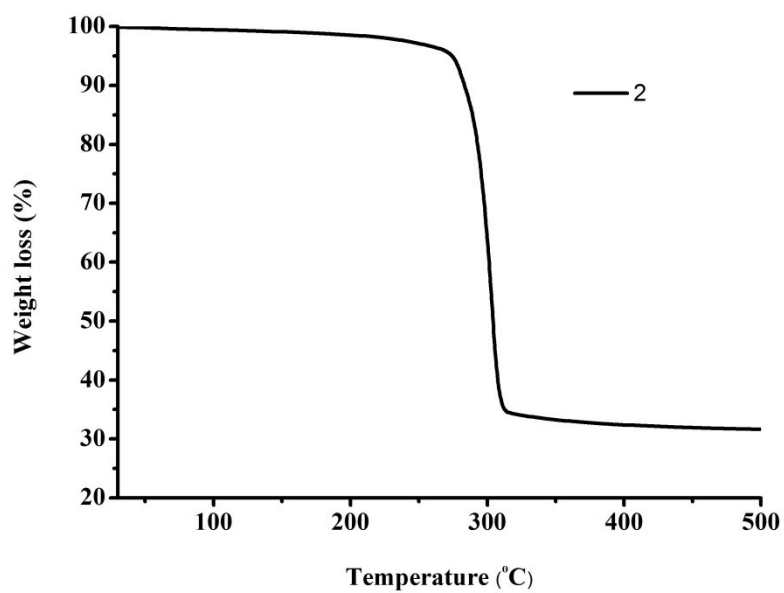

Fig. S24 Thermogravimetric analysis (TGA) curve of 2

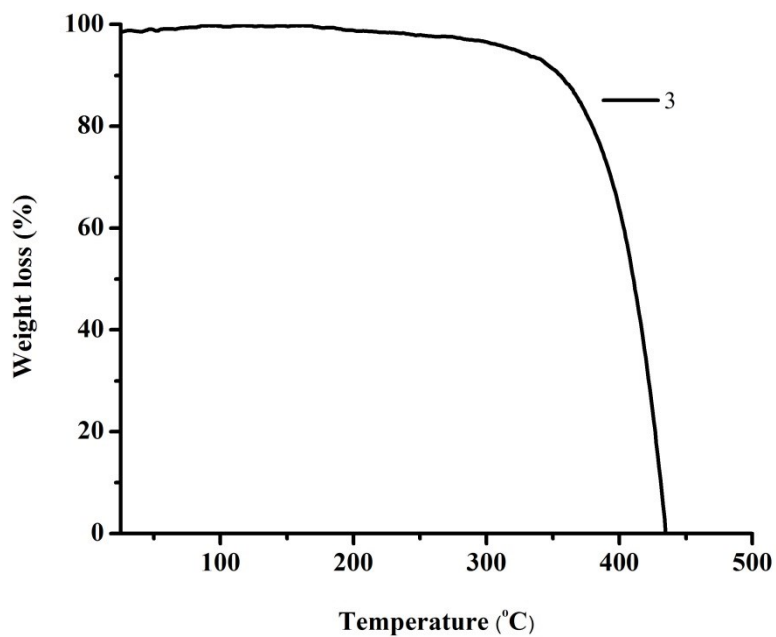

**Fig. S25** Thermogravimetric analysis (TGA) crve of **3**

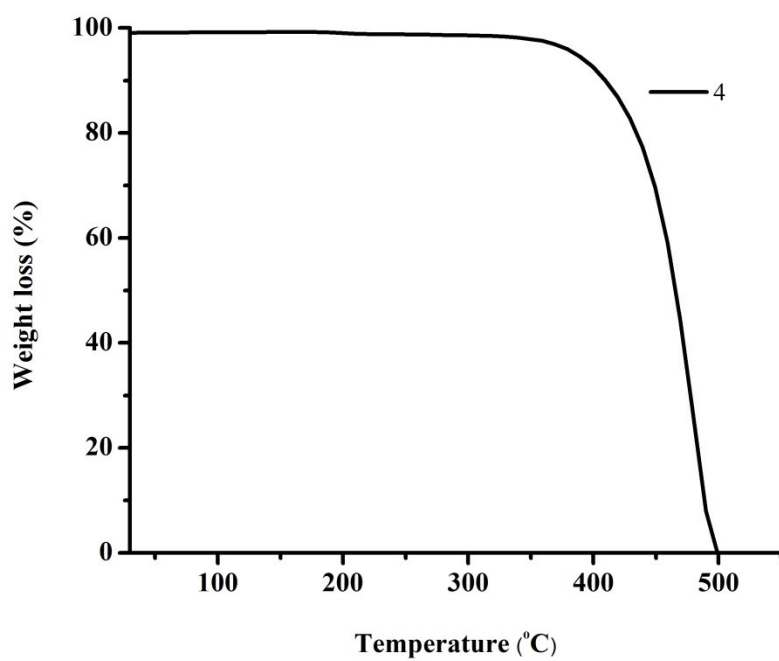

**Fig. S26** Thermogravimetric analysis (TGA) curve of **4**.

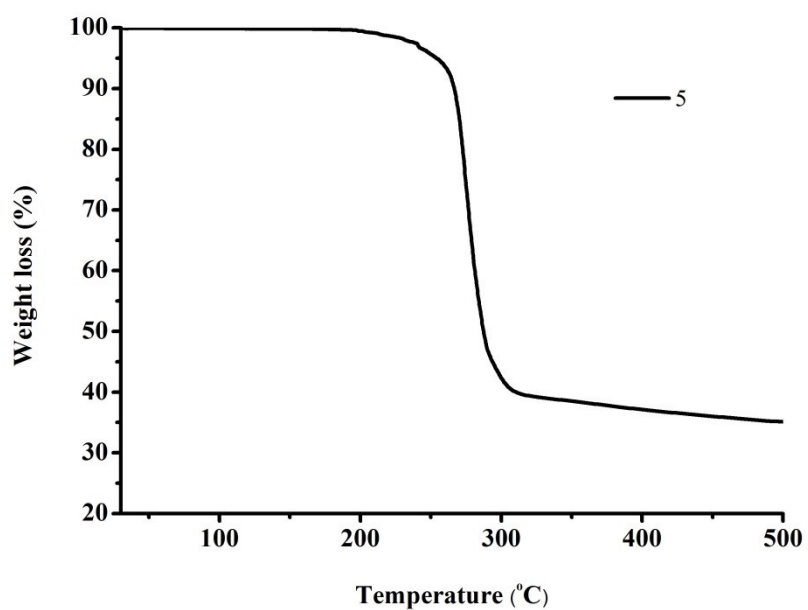

**Fig. S27** Thermogravimetric analysis (TGA) curve of **5**.

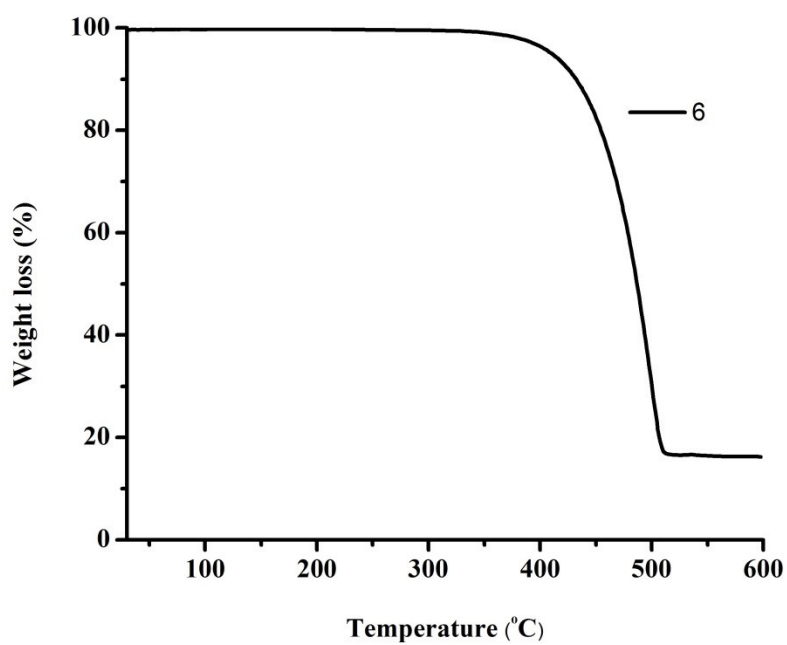

**Fig. S28** Thermogravimetric analysis (TGA) curve of **6**.

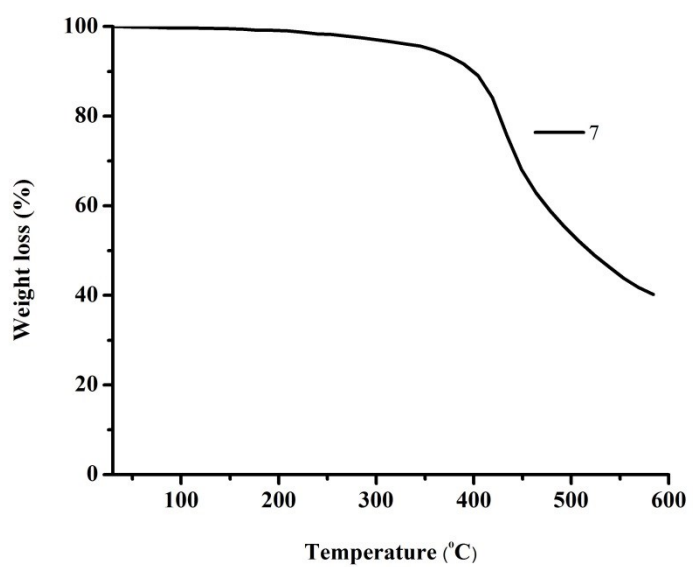

**Fig. S29** Thermogravimetric analysis (TGA) curve of **7**.

## 7. Single Crystal X-ray Crystallography Studies

**Table S1.** Crystal data and structure refinement for 1, 5 and 6

| <b>Compound</b>                              | <b>1</b>                                            | <b>5</b>                                            | <b>6</b>                                            |
|----------------------------------------------|-----------------------------------------------------|-----------------------------------------------------|-----------------------------------------------------|
| Empirical formula                            | C <sub>47</sub> H <sub>34</sub> N <sub>2</sub>      | C <sub>47</sub> H <sub>33</sub> N <sub>2</sub> F    | C <sub>47</sub> H <sub>33</sub> N <sub>2</sub> Cl   |
| Formula weight                               | 626.76                                              | 644.75                                              | 661.20                                              |
| T [K]                                        | 273.15                                              | 273.15                                              | 273.15                                              |
| Crystal system                               | triclinic                                           | triclinic                                           | triclinic                                           |
| Space group                                  | <i>P</i> -1                                         | <i>P</i> -1                                         | <i>P</i> -1                                         |
| a, Å                                         | 9.3970(14)                                          | 9.3263(10)                                          | 9.4495(3)                                           |
| b, Å                                         | 10.5684(15)                                         | 10.8791(12)                                         | 11.2688(3)                                          |
| c, Å                                         | 19.829(3)                                           | 19.822(2)                                           | 18.2721(6)                                          |
| α, deg                                       | 100.913(3)                                          | 98.441(4)                                           | 73.3150(10)                                         |
| β, deg                                       | 91.886(4)                                           | 94.465(3)                                           | 82.2680(10)                                         |
| γ, deg                                       | 113.365(3)                                          | 114.358(3)                                          | 74.3530(10)                                         |
| Volume (Å <sup>3</sup> )                     | 1762.3(5)                                           | 1790.8(3)                                           | 1791.27(10)                                         |
| Z                                            | 2                                                   | 2                                                   | 2                                                   |
| d <sub>calc</sub> (mg/cm <sup>3</sup> )      | 1.181                                               | 1.196                                               | 1.226                                               |
| μ (mm <sup>-1</sup> )                        | 0.068                                               | 0.073                                               | 0.143                                               |
| F(000)                                       | 660.0                                               | 676.0                                               | 692.0                                               |
| Crystal size/mm <sup>3</sup>                 | 0.42 × 0.38 × 0.28                                  | 0.33 × 0.18 × 0.1                                   | 0.38 × 0.22 × 0.2                                   |
| 2θ range for data collection/°               | 4.214 to 56.66                                      | 4.852 to 50.564                                     | 4.926 to 50.78                                      |
| Reflections collected                        | 36182                                               | 45852                                               | 19562                                               |
| Data/restraints/parameters                   | 8792/0/443                                          | 6481/0/452                                          | 6488/0/451                                          |
| Goodness-of-fit on F <sup>2</sup>            | 0.967                                               | 1.085                                               | 1.046                                               |
| R [ <i>I</i> > 2σ ( <i>I</i> )]              | R <sub>1</sub> = 0.0801<br>wR <sub>2</sub> = 0.1794 | R <sub>1</sub> = 0.1461<br>wR <sub>2</sub> = 0.4138 | R <sub>1</sub> = 0.0511<br>wR <sub>2</sub> = 0.1242 |
| R [all data]                                 | R <sub>1</sub> = 0.2186<br>wR <sub>2</sub> = 0.2475 | R <sub>1</sub> = 0.1720<br>wR <sub>2</sub> = 0.4278 | R <sub>1</sub> = 0.0603<br>wR <sub>2</sub> = 0.1303 |
| Largest diff. Peak/hole [e Å <sup>-3</sup> ] | 0.23/-0.21                                          | 0.51/-0.38                                          | 0.26/-0.45                                          |

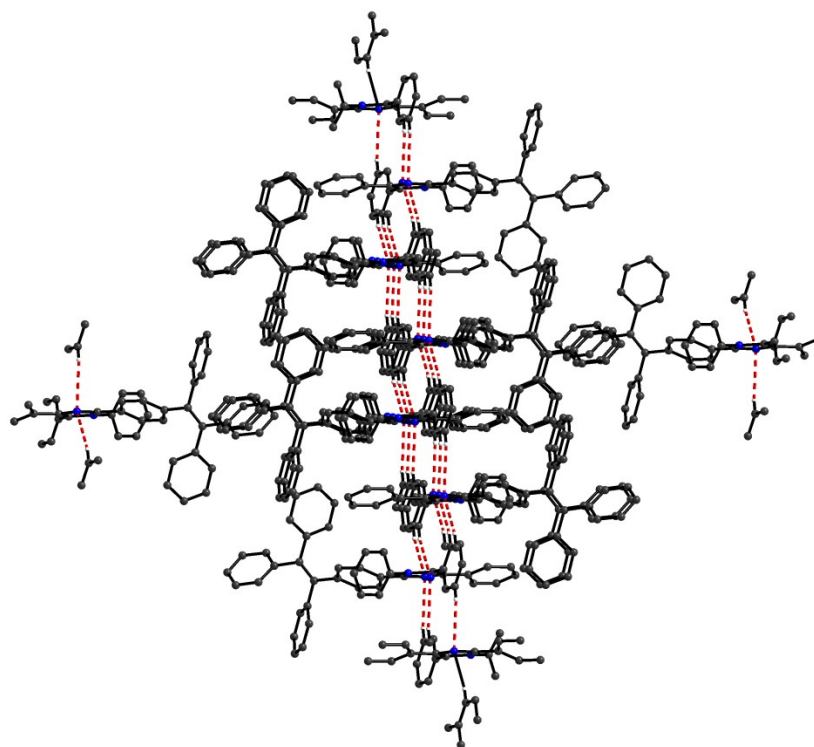

**Fig. S30** The single crystal packing diagram of **1**. N...H intermolecular hydrogen bonding occurring in the crystal structure shown in dashed lines. Only H atoms participating in hydrogen bonds are shown.

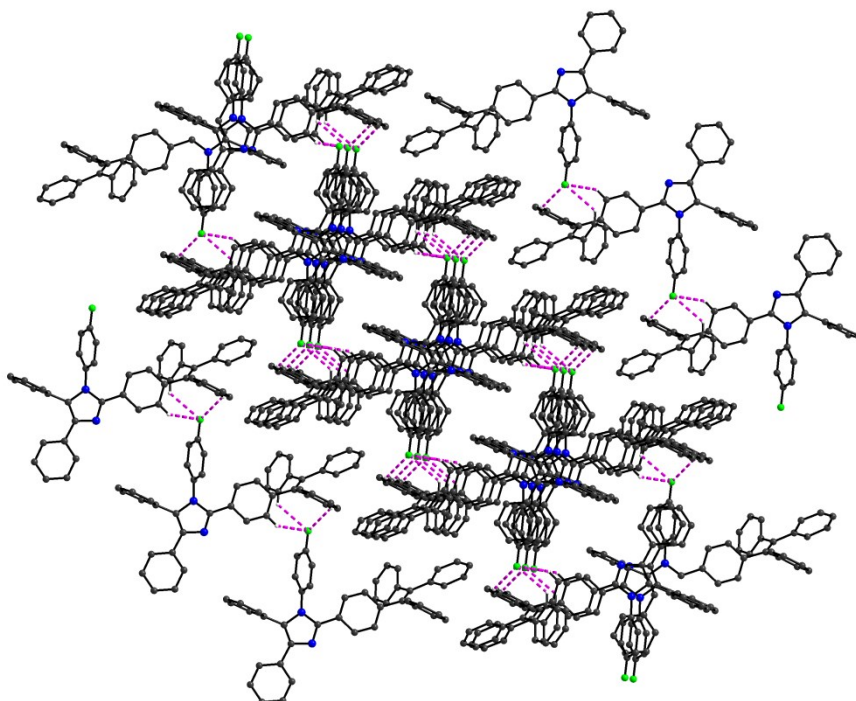

**Fig. S31** The single crystal packing diagram of **5**. F...H intermolecular hydrogen bonding occurring in the crystal structure shown in dashed lines. Only H atoms participating in hydrogen bonds are shown.



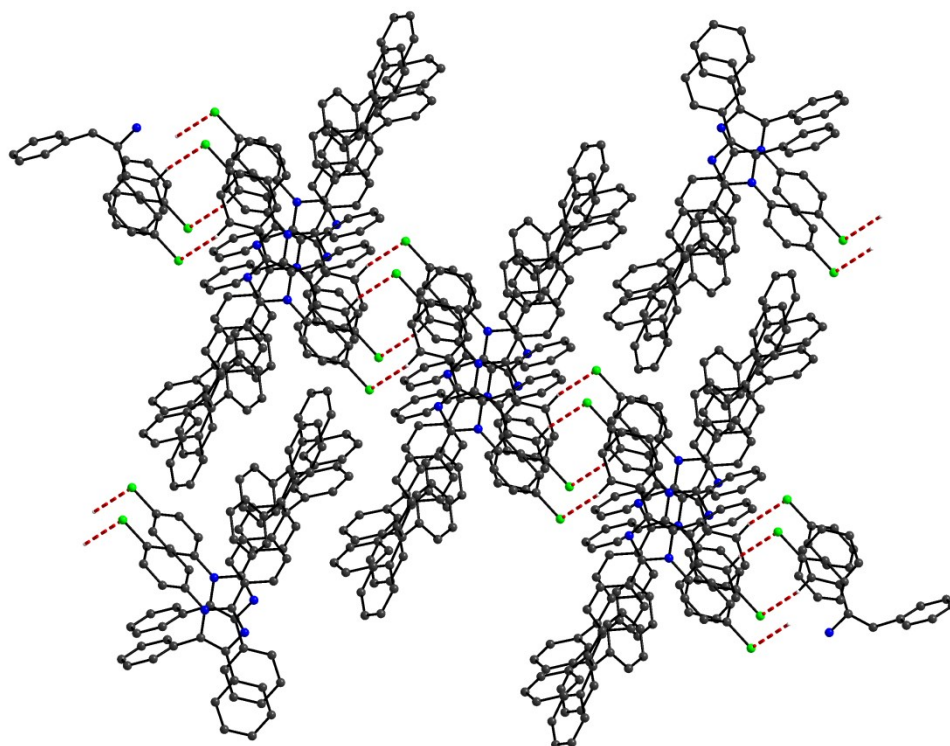

**Fig. S32** The single crystal packing diagram of **6**. Cl...H intermolecular hydrogen bonding occurring in the crystal structure shown in dashed lines. Only H atoms participating in hydrogen bonds are shown.

## 8. Mechanofluorochromism Studies

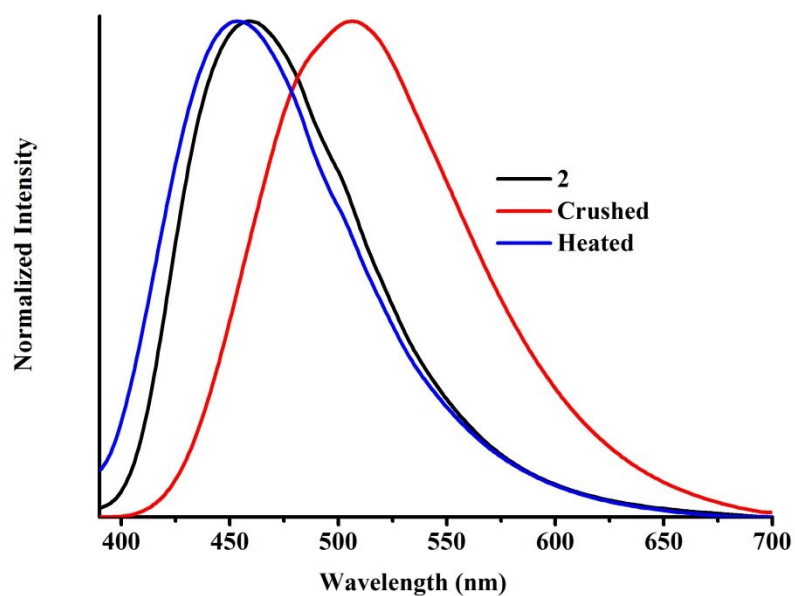

**Fig. S33** Mechanofluorochromism of 2. Crushed sample heated at 120 °C.

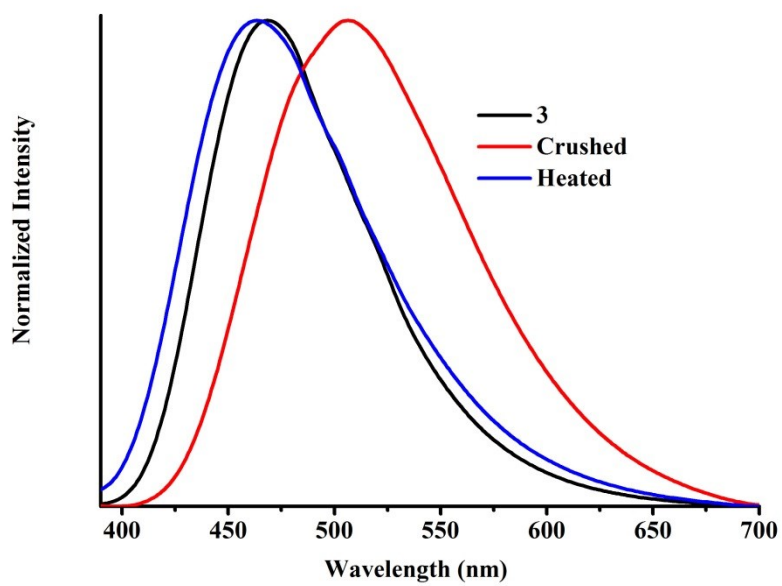

**Fig. S34** Mechanofluorochromism of 3. Crushed sample heated at 120 °C.

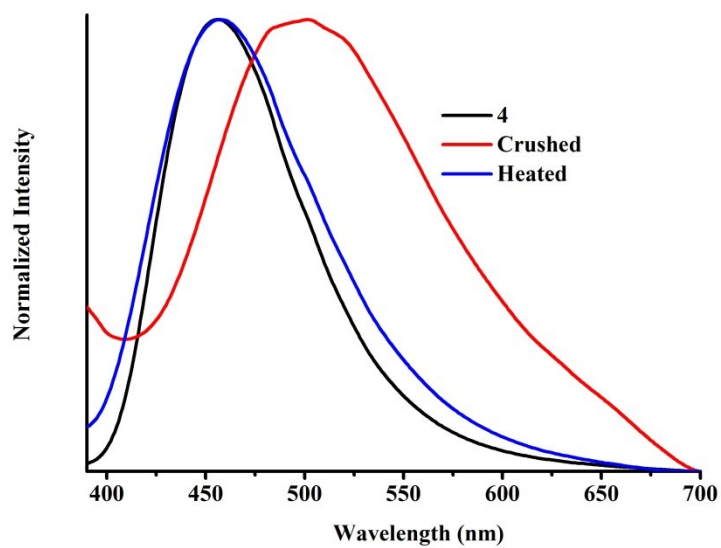

**Fig. S35** Mechanofluorochromism of 4. Crushed sample heated at 120 °C.

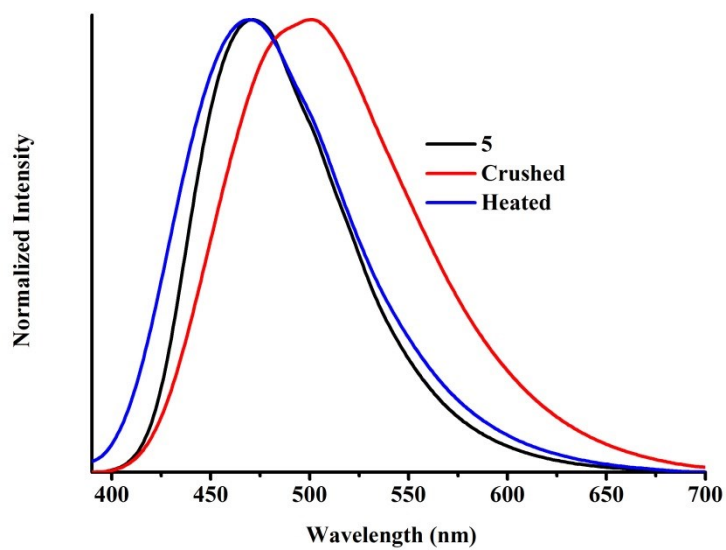

**Fig. S36** Mechanofluorochromism of 5. Crushed sample heated at 120 °C.

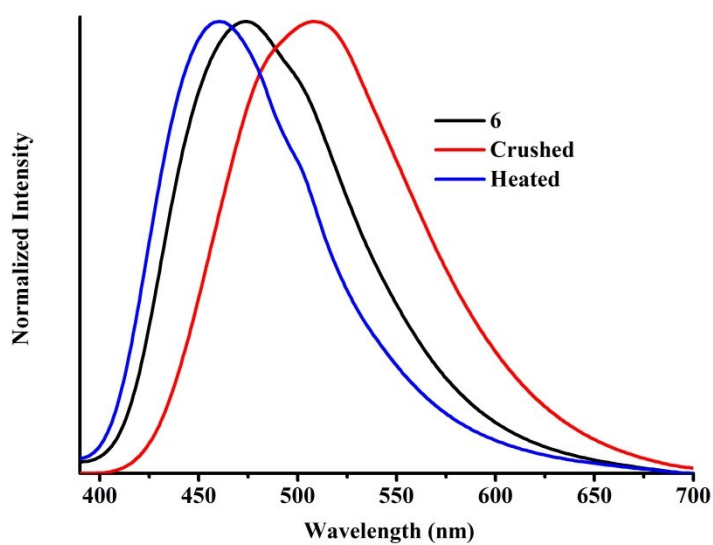

**Fig. S37** Mechanochromism of 6. Crushed sample heated at 120 °C.

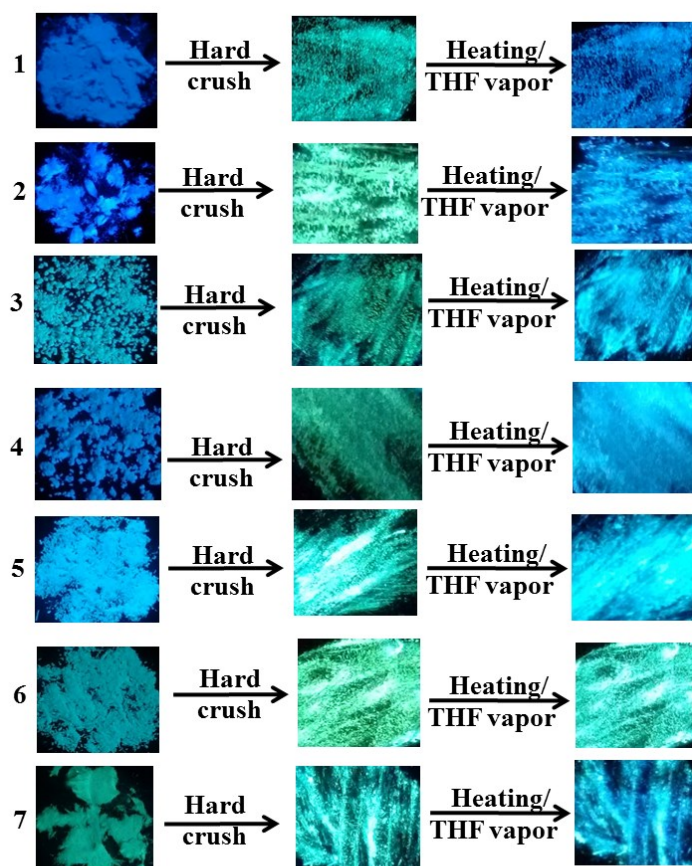

**Fig. S38** Mechanochromism of 1-7 upon crushing and heating/solvent exposure. Digital fluorescent images under in 365 nm of light.

## 9. Powder X-ray Diffraction (PXRD) Studies

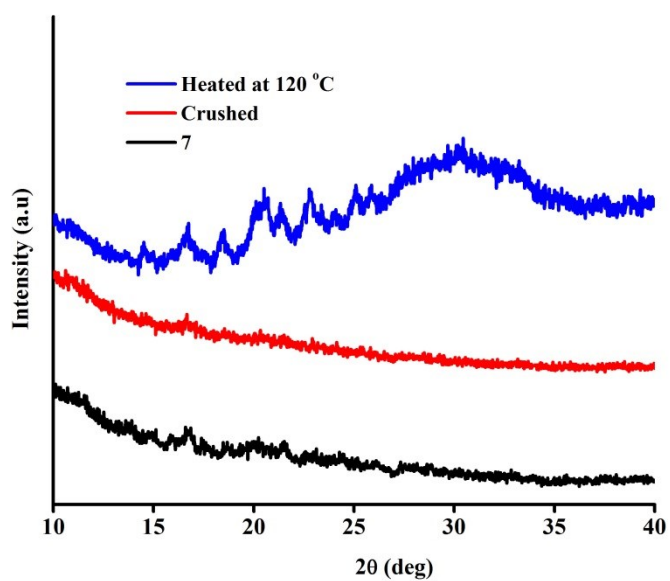

Fig. S39 PXRD pattern of 7.

## 10. Acid-Responsive Fluorescence Studies

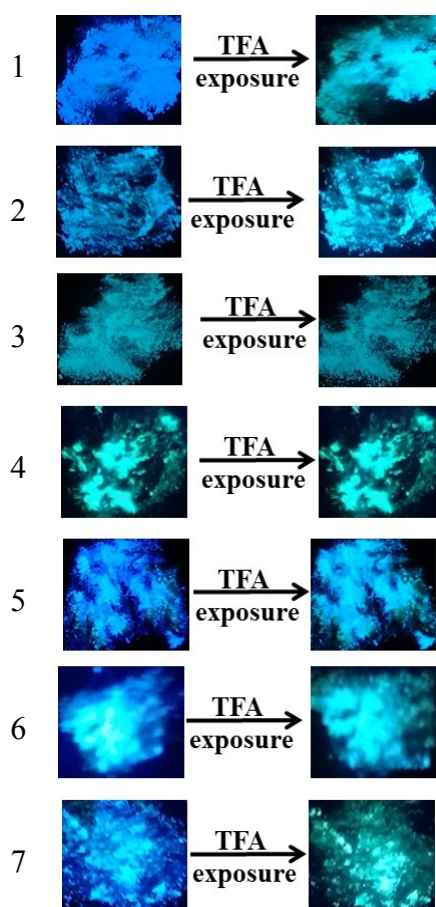

Fig. S40 Solid state fluorescent images of 1-7 before and after TFA exposure. Digital fluorescent images were taken under UV-light of 365 nm.

## 10. References

1. G. M. Sheldrick, *SHELXS-97: A Program for Structure Solution*, University of Göttingen, Germany, 1997.
2. G. M. Sheldrick, *SHELXL-97: A Program for Structure Refinement*, University of Göttingen, Germany, 1997.
